# Supplementary material
Source: HighWire-hosted journal article supplement (https://bmjopen.bmj.com/content/10/12/e039036)
Supplement: inline-supplementary-material-2 [file inline-supplementary-material-2.pdf]

**Supplementary file 2.** Search Strategy OVID Medline: Dairy, CVD, Adults

1. Randomized controlled trial\*.tw.
2. experimental design.tw.
3. intervention\*.tw.
4. (RCT\* or rct\*).tw.
5. random\* control\* trial\*.tw.
6. clinical trial\*.tw.
7. field trial\*.tw.
8. community trial\*.tw.
9. controlled clinical trial\*.tw.
10. pragmatic trial\*.tw.
11. observational stud\*.tw.
12. cohort stud\*.tw.
13. prospective cohort\*.tw.
14. retrospective cohort\*.tw.
15. case control\*.tw.
16. ecological stud\*.tw.
17. time series analys?s\*.tw.
18. before-after stud\*.tw.
19. pre-post stud\*.tw.
20. follow up stud\*.tw.
21. comparative stud\*.tw.
22. evaluation stud\*.tw.
23. dairy.mp.
24. dairy intake\*.mp.

25. dairy consumption.mp.
26. dairy food\*.mp.
27. Dairy Products/ or dairy product\*.mp.
28. dairy serv\*.mp.
29. dairy type\*.mp.
30. dairy source\*.mp.
31. (calcium adj15 food sourc\*).mp. [mp=title, abstract, original title, name of substance word, subject heading word, keyword heading word, protocol supplementary concept word, rare disease supplementary concept word, unique identifier]
32. (vitamin D adj15 food sourc\*).mp. [mp=title, abstract, original title, name of substance word, subject heading word, keyword heading word, protocol supplementary concept word, rare disease supplementary concept word, unique identifier]
33. (milk and (cow or goat or sheep)).mp. [mp=title, abstract, original title, name of substance word, subject heading word, keyword heading word, protocol supplementary concept word, rare disease supplementary concept word, unique identifier]
34. yogurt.mp. or Yogurt/
35. cheese.mp. or Cheese/
36. custard.mp.
37. (milk and (skim or full fat or low fat)).mp. [mp=title, abstract, original title, name of substance word, subject heading word, keyword heading word, protocol supplementary concept word, rare disease supplementary concept word, unique identifier]
38. (yogurt and (skim or full fat or low fat)).mp. [mp=title, abstract, original title, name of substance word, subject heading word, keyword heading word, protocol supplementary concept word, rare disease supplementary concept word, unique identifier]
39. Milk/
40. 23 or 24 or 25 or 26 or 27 or 28 or 29 or 30 or 31 or 32 or 33 or 34 or 35 or 36 or 37 or 38 or 39
41. cardiovascular disease.mp. or exp Cardiovascular Diseases/
42. coronary\*.tw.

43. heart\*.tw.
44. cardia\*.tw.
45. cardio\*.tw.
46. myocard\*.tw.
47. isch?em\*.tw.
48. angina\*.tw.
49. ventric\*.tw.
50. tachycardi\*.tw.
51. pericard\*.tw.
52. endocardi\*.tw.
53. atrial fibrillat\*.tw.
54. arrhythmi\*.tw.
55. athero\*.tw.
56. arterio\*.tw.
57. exp Atherosclerosis/
58. exp Arteriosclerosis/
59. HDL.tw.
60. LDL.tw.
61. VLDL.tw.
62. lipid\*.tw.
63. lipoprotein\*.tw.
64. triacylglycerol\*.tw.
65. exp Hyperlipidemias/
66. hyperlipid\*.tw.
67. hypercholesterol\*.tw.

68. hypercholester?emia\*.tw.
69. hypertriglycerid?emia\*.tw.
70. exp Cholesterol/
71. cholesterol\*.tw.
72. exp Stroke/
73. stroke\*.tw.
74. CVA.tw.
75. cerebrovasc\*.tw.
76. "vascular accident".tw.
77. TIA.tw.
78. cerebral vascular.tw.
79. thrombo\*.tw.
80. emboli\*.tw.
81. apoplexy.tw.
82. (brain adj2 accident\*).tw.
83. ((brain\* or cerebral or lacunar) adj2 infarct\*).tw.
84. Hypertension/
85. exp Blood Pressure/
86. hypertensi\*.tw.
87. blood pressure\*.tw.
88. systolic blood pressure.tw.
89. diastolic blood pressure.tw.
90. peripheral arter\* disease\*.tw.
91. (coronar\$ adj5 (bypas\$ or graft\$ or disease\$ or event\$)).tw.
92. (cerebrovasc\$ or cardiovasc\$ or mortal\$ or angina\$ or stroke or strokes).tw.

93. (myocardi\$ adj5 (infarct\$ or revascular\$ or ischaemi\$ or ischemi\$)).tw.
94. (morbid\$ adj5 (heart\$ or coronar\$ or ischaem\$ or ischem\$ or myocard\$)).tw.
95. (vascular\$ adj5 (peripheral\$ or disease\$ or complication\$)).tw.
96. (heart\$ adj5 (disease\$ or attack\$ or bypass\$)).tw.
97. 41 or 42 or 43 or 44 or 45 or 46 or 47 or 48 or 49 or 50 or 51 or 52 or 53 or 54 or 55 or 56 or 57 or 58 or 59 or 60 or 61 or 62 or 63 or 64 or 65 or 66 or 67 or 68 or 69 or 70 or 71 or 72 or 73 or 74 or 75 or 76 or 77 or 78 or 79 or 80 or 81 or 82 or 83 or 84 or 85 or 86 or 87 or 88 or 89 or 90 or 91 or 92 or 93 or 94 or 95 or 96
98. 1 or 2 or 3 or 4 or 5 or 6 or 7 or 8 or 9 or 10 or 11 or 12 or 13 or 14 or 15 or 16 or 17 or 18 or 19 or 20 or 21 or 22
99. 40 and 97 and 98
100. limit 99 to yr="2000 - 2019"
101. limit 100 to humans
102. limit 101 to "all adult (19 plus years)"
